# Supplementary material for: Effectiveness of Treatments That Alter Metabolomics in Cancer Patients—A Systematic Review
Source: MDPI journal article supplement (doi:10.3390/cancers15174297), 2023-08-28
Supplement: s1 [file s1]

## Supplementary Tables

- Table S1- Search strategies
- Table S2. GRADE System

**Table S1.** Search strategies

| Platform | Search Strategies                                                                                                                                                                                                                                                                                                                                                                                                         |
|----------|---------------------------------------------------------------------------------------------------------------------------------------------------------------------------------------------------------------------------------------------------------------------------------------------------------------------------------------------------------------------------------------------------------------------------|
| PubMed   | ((“Neoplasms”[Mesh]) AND (“metabolomics”[Mesh] OR “metabolome”[Mesh] OR “genetics”[Mesh] OR “mycobiome”[Mesh] OR “microbiota”[Mesh]) OR (“cancer pain”[Mesh] OR “pain”[Mesh] OR “quality of life”[Mesh]) OR (“Cancer”[tw] OR “neoplasms”[tw]) AND (“metabolomics”[tw] OR “metabolites”[tw] OR “metabolome”[tw] OR “genetics”[tw] OR “human genetics”[tw]) AND (“cancer pain”[tw] OR “pain”[tw] OR “quality of life”[tw])) |
| SCOPUS   | ((“Cancer” OR “neoplasms”) AND (“metabolomics” OR “metabolites” OR “metabolome” OR “genetics” OR “human genetics”) AND (“cancer pain” OR “pain” OR “quality of life”)) OR ((“Neoplasms”) AND (“metabolomics” OR “metabolome” OR “genetics” OR “mycobiome” OR “microbiota”) OR (“cancer pain” OR “pain” OR “quality of life”))                                                                                             |

LILACS  
IBECS  
(BVS)

Tw:((“Cancer” OR “neoplasms”) AND (“metabolomics” OR “metabolites” OR “metabolome” OR “genetics” OR “human genetics”) AND (“cancer pain” OR “pain” OR “quality of life”)) OR Mh: ((“Neoplasms”) AND (“metabolomics” OR “metabolome” OR “genetics” OR “mycobiome” OR “microbiota”) OR (“cancer pain” OR “pain” OR “quality of life”))

Cochrane Library

- 
- #1 Cancer
  - #2 neoplasms
  - #3 metabolomics
  - #4 metabolites
  - #5 metabolome
  - #6 genetics
  - #7 human genetics
  - #8 cancer pain
  - #9 pain
  - #10 quality of life
  - #11 MeSH descriptor: [Neoplasms] explode all trees

- #12 MeSH descriptor: [Metabolomics] explode all trees
- #13 MeSH descriptor: [Metabolomics] explode all trees
- #14 MeSH descriptor: [Genetics] explode all trees
- #15 MeSH descriptor: [Mycobiome] explode all treeS
- #16 MeSH descriptor: [Microbiota] explode all trees
- #17 MeSH descriptor: [Cancer Pain] explode all trees
- #18 MeSH descriptor: [Pain] explode all treeS
- #19 MeSH descriptor: [Quality of Life] explode all trees
- #20 ((#1 OR #2) AND (#3 OR #4 OR #5 OR #6 OR #7) AND (#8 OR #9 OR #10)) OR ((#11) AND (#12 OR #13 OR #14 OR #15 OR #16) AND (#17 OR #18 OR #19))

---

|       |                                                                                                                                                                                                                                                                                                                                 |
|-------|---------------------------------------------------------------------------------------------------------------------------------------------------------------------------------------------------------------------------------------------------------------------------------------------------------------------------------|
| EBSCO | MH(("Neoplasms") AND ("metabolomics" OR "metabolome" OR "genetics" OR "mycobiome" OR "microbiota") OR ("cancer pain" OR "pain" OR "quality of life")) OR (("Cancer" OR "neoplasms") AND ("metabolomics" OR "metabolites" OR "metabolome" OR "genetics" OR "human genetics") AND ("cancer pain" OR "pain" OR "quality of life")) |
|-------|---------------------------------------------------------------------------------------------------------------------------------------------------------------------------------------------------------------------------------------------------------------------------------------------------------------------------------|

---

|                |                                                                                                                                                                            |
|----------------|----------------------------------------------------------------------------------------------------------------------------------------------------------------------------|
| Web of science | TS= (("Cancer" OR "neoplasms") AND ("metabolomics" OR "metabolites" OR "metabolome" OR "genetics" OR "human genetics") AND ("cancer pain" OR "pain" OR "quality of life")) |
|----------------|----------------------------------------------------------------------------------------------------------------------------------------------------------------------------|

---

Table S2. GRADE System

Author(s): Dina Hamed-Hamed, Santiago Navarro-Ledesma

Question: Metabolomics compared to for cancer patients

Setting: University of Granada

Bibliography:

| Certainty assessment                     |                   |              |                      |              |                      |                        | Impact                                                                                                                                                                                                                                                                                                                                                                                    | Certainty                                                                                       | Importance    |
|------------------------------------------|-------------------|--------------|----------------------|--------------|----------------------|------------------------|-------------------------------------------------------------------------------------------------------------------------------------------------------------------------------------------------------------------------------------------------------------------------------------------------------------------------------------------------------------------------------------------|-------------------------------------------------------------------------------------------------|---------------|
| Nº of studies                            | Study design      | Risk of bias | Inconsistency        | Indirectness | Imprecision          | Other considerations   |                                                                                                                                                                                                                                                                                                                                                                                           |                                                                                                 |               |
| Metabolomics (follow-up: median 8 weeks) |                   |              |                      |              |                      |                        |                                                                                                                                                                                                                                                                                                                                                                                           |                                                                                                 |               |
| 9                                        | randomised trials | not serious  | serious <sup>a</sup> | not serious  | serious <sup>b</sup> | dose response gradient | Of the 3 studies that received pharmacological treatment, one found no difference in the metabolome of the patients, the other two studies did. The study using exercise as an intervention also showed no change in metabolomics. There were very beneficial changes in metabolites in the 4 studies that used dietary supplements and the study that used traditional Chinese medicine. | <br>Moderate | NOT IMPORTANT |

CI: confidence interval

Explanations

- a. Interventions have been shown to improve the human metabolome, but specific biomarkers have yet to be studied to eradicate the disease
- b. Due to the low sample size of many studies
- c. Of the 3 studies that received pharmacological treatment, one found no difference in the metabolome of the patients, the other two studies did. The study using exercise as an intervention also showed no change in metabolomics. There were very beneficial changes in metabolites in the 4 studies that used dietary supplements and the study that used traditional Chinese medicine.
